# Supplementary material for: Atypical multiferroicity of HoCrO3 in bulk and film geometry
Source: Royal Society of Chemistry journal article supplement (doi:10.1039/c5tc00269a), 2015-01-01
Supplement: c5tc00269a1.pdf [file c5tc00269a1.pdf]

Electronic Supplementary Information (ESI) for

**Atypical multiferroicity of  $\text{HoCrO}_3$  in bulk and film geometry**

A. Ghosh, A. Pal, K. Dey, S. Majumdar, and S. Giri\*

*Department of Solid State Physics,*

*Indian Association for the Cultivation of Science, Jadavpur, Kolkata 700032, India.*

---

\*Electronic address: [sspsg2@iacs.res.in](mailto:sspsg2@iacs.res.in)

## I. SURFACE CHARACTERIZATION

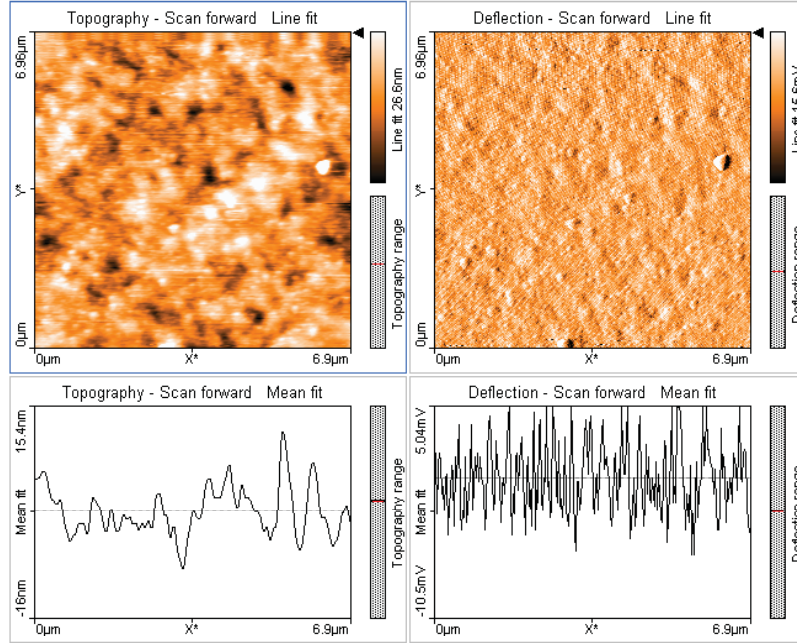

Figure S1: AFM image and depth profile of  $\text{HoCrO}_3$  film.

AFM image shows nearly homogeneous surface topography as depicted in Fig. S1. The color bar indicates the Z-range or the depth profile.

## II. ELECTRICAL CONNECTION FOR ELECTRIC POLARIZATION MEASUREMENT IN FILM

For  $P - E$  loop measurements in film, initially gold is coated on the Si substrate using a gold coater (Eiko IB-2 Ion coater, Japan) on which  $\text{HoCrO}_3$  film is deposited. Schematic representation of the electrical connection is shown in Fig. S2.

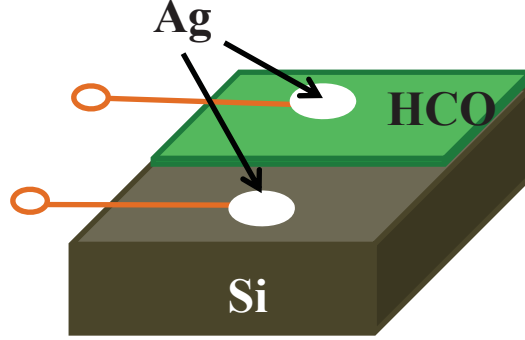

Figure S2: Schematic representation of the electrical connection for  $P - E$  loop measurement in film.

### III. LOW TEMPERATURE STRUCTURE

Low temperature structure has been evaluated using Rietveld refinement of x-ray diffraction pattern. Fig. S3 shows satisfactory fit using Rietveld refinement of the diffraction pattern of  $\text{HoCrO}_3$  measured at 80 K. The details of the structural parameters as obtained from the refinement are given in Table S1.

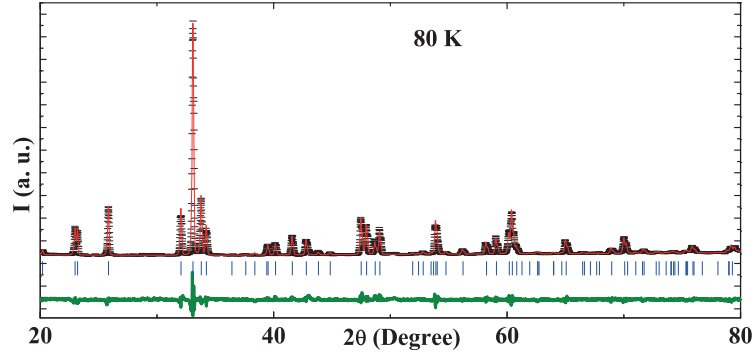

Figure S3: Rietveld refinement pattern of  $\text{HoCrO}_3$ . X-ray diffraction pattern recorded at 80 K temperature.

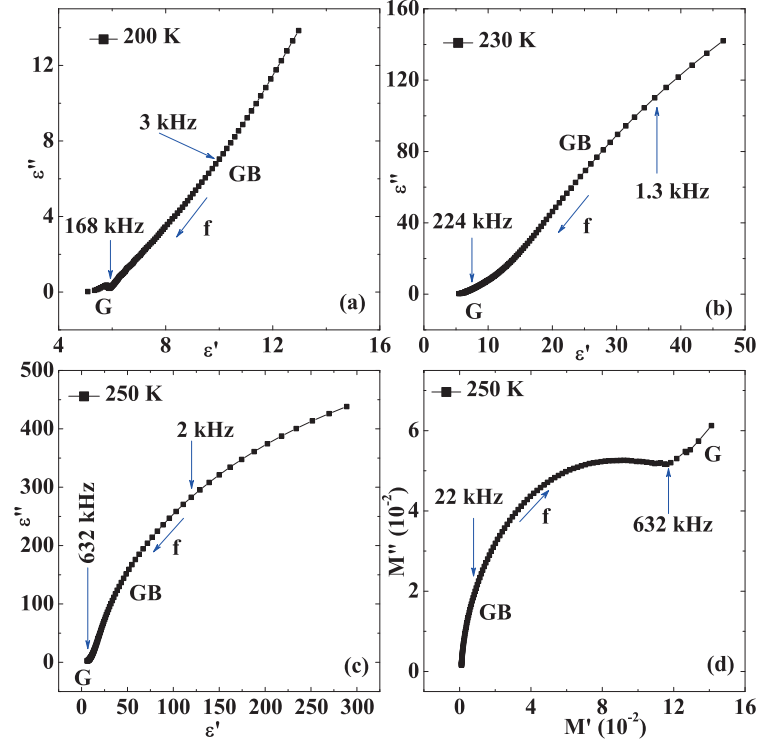

Figure S4: Cole-Cole plot at temperatures (a) 200 K, (b) 230 K, (c) 250 K and (d) complex-modulus plot at 250 K for bulk  $\text{HoCrO}_3$ .

#### IV. COLE-COLE PLOT

Rapid increase of dielectric permittivity in bulk  $\text{HoCrO}_3$  is due to the different conduction mechanism involved in grain (G) and grain-boundary (GB). It is clear from the Fig. S4 a that  $f=1$  kHz is at the tail of the grain-boundary arc of the complex- $\epsilon$  plot. This indicates the low frequency lines at temperatures greater than 200 K corresponds to extrinsic grain-boundary effect. Also it is clear from Figs. S4 b and c that with increase in temperature G arc decreases and GB arc increases. The high frequency components remains within G arc even at high temperature. This provides a conclusive proof of presence of grain-boundary led extrinsic effect at high temperatures for bulk  $\text{HoCrO}_3$ . As electric modulus shows real dielectric relaxation mechanism Fig. S4 d shows small G effect at high frequency range and large GB effect at low frequency range. So, the rapid increase in dielectric permittivity is

due to extrinsic grain-boundary effect.

## **V. RIETVELD REFINEMENT PARAMETERS**

TABLE I: Rietveld refinement parameters obtained from x-ray diffraction data of  $\text{HoCrO}_3$  using MAUD software package. The numbers in the parenthesis are the statistical errors in the last significant digits.

| <b>Lattice parameters</b>  |                   |                   |            |
|----------------------------|-------------------|-------------------|------------|
| T (K)                      | 80 K              | 160 K             | 300K       |
| $a$ (Å)                    | 5.5060(1)         | 5.5089(2)         | 5.2517 (2) |
| $b$ (Å)                    | 5.2359(2)         | 5.2410 (1)        | 5.5207 (1) |
| $c$ (Å)                    | 7.5218(1)         | 7.5310 (2)        | 7.5468 (1) |
| Space group                | Pna <sub>21</sub> | Pna <sub>21</sub> | Pbnm       |
| <b>Atomic positions</b>    |                   |                   |            |
| Ho ( $X$ )                 | 0.0656 (1)        | 0.0646(1)         | -0.0192(1) |
| Ho ( $Y$ )                 | 0.0175 (2)        | -0.0170(1)        | 0.0639(2)  |
| Ho ( $Z$ )                 | 0.1788(2)         | 0.4727(2)         | 0.25 (0)   |
| Cr ( $X$ )                 | 0.0104 (2)        | 0.0023 (1)        | 0.5 (0)    |
| Cr ( $Y$ )                 | 0.4830 (2)        | 0.4892(2)         | 0 (0)      |
| Cr ( $Z$ )                 | -0.0831 (2)       | -0.2802(1)        | 0 (0)      |
| O1 ( $X$ )                 | 0.4499 (1)        | -0.0861(1)        | 0.0899(2)  |
| O1 ( $Y$ )                 | -0.1144(2)        | 0.4155 (2)        | 0.4599 (2) |
| O1 ( $Z$ )                 | 0.1634 (2)        | 0.2278 (2)        | 0.25 (0)   |
| O2 ( $X$ )                 | 0.0573 (1)        | 0.0499 (2)        | 0.3265 (2) |
| O2 ( $Y$ )                 | 0.4569 (1)        | 0.6003 (1)        | 0.1722 (1) |
| O2 ( $Z$ )                 | 0.4169 (2)        | 0.0119 (2)        | 0.0004(3)  |
| O3 ( $X$ )                 | 0.7028 (1)        | 0.2011 (1)        | -          |
| O3 ( $Y$ )                 | 0.6977 (1)        | 0.1938 (2)        | -          |
| O3 ( $Z$ )                 | 0.4818 (2)        | -0.2144 (2)       | -          |
| <b>Reliability factors</b> |                   |                   |            |
| $R_w$ (%)                  | 5.9350            | 7.7348            | 5.7941     |
| $R_{wnb}$ (%)              | 6.1372            | 8.2315            | 8.2655     |
| $R_b$ (%)                  | 4.5496            | 5.7376            | 4.0158     |
| $R_{exp}$ (%)              | 4.2661            | 3.5464            | 1.3623     |
